# Supplementary material
Source: PubMed Central journal article supplement (PMC6563803)
Supplement: NIHMS1013037-supplement-Supplemental_Tables.pdf [file NIHMS1013037-supplement-Supplemental_Tables.pdf]

**Table S1.** Patients' clinical and pathological characteristics.

|                           | Training cohort           | Validation cohort    |                  |
|---------------------------|---------------------------|----------------------|------------------|
|                           | MDA                       | CIBERES <sup>2</sup> | CUN <sup>3</sup> |
|                           | MDA <sup>1</sup><br>n=239 | n=75                 | n=39             |
| <b>Stage</b>              |                           |                      |                  |
| IA                        | 73 (30.5%)                | 20 (26.7%)           | 13 (33.4%)       |
| IA1                       | 4 (1.7%)                  | 2 (2.7%)             | 4 (10.3%)        |
| IA2                       | 46 (19.2%)                | 8 (10.7%)            | 6 (15.4%)        |
| IA3                       | 23 (9.6%)                 | 10 (13.3%)           | 2 (5.1%)         |
| IB                        | 59 (24.7%)                | 18 (24.0%)           | 6 (15.4%)        |
| IIA                       | 14 (5.9%)                 | 4 (5.3%)             | 2 (5.1%)         |
| IIB                       | 41 (17.2%)                | 25 (33.3%)           | 11 (28.2%)       |
| IIIA                      | 39 (16.3%)                | 8 (10.7%)            | 7 (17.9%)        |
| IIIB                      | 6 (2.5%)                  | 0 (0%)               | 0 (0%)           |
| IVA                       | 7 (2.9%)                  | 0 (0%)               | 0 (0.0%)         |
| <b>Gender</b>             |                           |                      |                  |
| Male                      | 99 (41.4%)                | 54 (71.1%)           | 33 (84.6%)       |
| Female                    | 140 (58.6%)               | 22 (28.9%)           | 6 (15.4%)        |
| <b>Age (years)</b>        |                           |                      |                  |
| <65                       | 33 (13.8%)                | 42 (55.3%)           | 24 (61.5%)       |
| ≥65                       | 206 (86.2%)               | 34 (44.7%)           | 15 (38.5%)       |
| <b>Adjuvant treatment</b> |                           |                      |                  |
| No                        | 137 (57.3%)               |                      | 22 (56.4%)       |
| Yes                       | 87 (36.4%)                |                      | 17 (43.6%)       |
| Unknown                   | 9 (6.3%)                  | 76 (100%)            | 0 (0.0%)         |
| <b>Tobacco</b>            |                           |                      |                  |
| Never                     | 42 (17.6%)                |                      | 5 (12.8%)        |
| Former                    | 110 (46.0%)               |                      | 30 (76.9%)       |
| Current                   | 87 (36.4%)                |                      | 4 (10.3%)        |
| Unknown                   | 0 (0.0%)                  | 76 (100%)            | 0 (0.0%)         |

Data are n (%). <sup>1</sup>MDA = M.D. Anderson Cancer Center cohort; <sup>2</sup>CIBERES Pulmonary Biobank Platform; <sup>3</sup>CUN=Clinica Universidad de Navarra.

**Table S2.** Conditions for protein detection by IHC in formalin fixed paraffin embedded lung cancer samples.

| <b>Protein</b> | <b>Reference</b>         | <b>Host<sup>1</sup></b> | <b>Class<sup>2</sup></b> | <b>Pre-treatment<sup>3</sup></b> | <b>Dilution</b> | <b>Detection method</b> |
|----------------|--------------------------|-------------------------|--------------------------|----------------------------------|-----------------|-------------------------|
| BRCA1          | Genetex (GTX70113)       | M                       | M                        | PT-CIT pH6 (20 min 95 °C)        | 1:500           | EnVision M              |
| CDC6           | Santa Cruz (sc-56273)    | M                       | M                        | PT-EDTA pH9 (20 min 95 °C)       | 1:20            | EnVision M              |
| LIG1           | Areta International      | M                       | M                        | PT-EDTA pH9 (20 min 95 °C)       | 1:500           | EnVision M              |
| QKI            | Sigma (HPA019123)        | R                       | P                        | PT-EDTA pH9 (20 min 95 °C)       | 1:500           | EnVision R              |
| RAD51          | Calbiochem (PC130)       | R                       | P                        | PT-EDTA pH9 (20 min 95 °C)       | 1:100           | EnVision R              |
| RAE1           | Genetex (EPR6923)        | R                       | M                        | PT-CIT pH6 (20 min 95 °C)        | 1:250           | EnVision R              |
| RRM2           | Sigma (WH0006241M1)      | M                       | M                        | PT-CIT pH6 (20 min 95 °C)        | 1:3000          | EnVision M              |
| SIRT2          | Santa Cruz (sc-28298)    | M                       | M                        | PT-CIT pH6 (20 min 95 °C)        | 1:50            | EnVision M              |
| SLC2A1         | Proteintech (21829-1-AP) | R                       | P                        | PT-CIT pH6 (20 min 95 °C)        | 1:1000          | EnVision R              |
| SNRPE          | Proteintech (20407-1-AP) | R                       | P                        | PT-CIT pH6 (20 min 95 °C)        | 1:200           | EnVision R              |
| SRSF1          | Zymed (32-4600)          | M                       | M                        | PT-EDTA pH9 (20 min 95 °C)       | 1:200           | EnVision M              |
| STC1           | Santa Cruz (sc-14346)    | G                       | P                        | PT-CIT pH6 (20 min 95 °C)        | 1:100           | Streptavidin HRP        |

<sup>1</sup>**M:** Mouse, **R:** Rabbit, **G:** Goat; <sup>2</sup>**M:** Monoclonal, **P:** Polyclonal; <sup>3</sup>**PT-CIT:** PT-linker buffer citrate (ThermoScientific), **PT-EDTA:** PT-linker buffer Tris EDTA (ThermoScientific).

**Table S3.** *P* values obtained after survival analysis in the microarray datasets.<sup>1</sup>

| Gene            | Survival analysis | Bild <sup>a</sup> | Lee <sup>b</sup> | Director's Consortium <sup>c</sup> | Okayama <sup>d</sup> | Tomida <sup>e</sup> | Wilkerson <sup>f</sup> | Larsen <sup>g</sup> | Raponi <sup>h</sup> | Wilkerson <sup>i</sup> |
|-----------------|-------------------|-------------------|------------------|------------------------------------|----------------------|---------------------|------------------------|---------------------|---------------------|------------------------|
| <i>ADARB1</i>   | DFS               |                   | 0.580            | <b>0.013</b>                       | 0.345                |                     |                        |                     |                     | 0.820                  |
|                 | OS                | 0.541             |                  | <b>0.013</b>                       | 0.249                | 0.275               | 0.929                  | 0.437               | 0.721               | 0.885                  |
| <i>AGFG1</i>    | DFS               |                   | 0.893            | 0.443                              | <b>0.001</b>         |                     |                        |                     |                     | 0.829                  |
|                 | OS                | 0.707             |                  | 0.809                              | <b>0.001</b>         | 0.133               | 0.604                  | 0.353               | 0.221               | 0.920                  |
| <i>BAG1</i>     | DFS               |                   | 0.944            | 0.863                              | 0.552                |                     |                        |                     |                     | 0.585                  |
|                 | OS                | 0.874             |                  | 0.466                              | 0.693                | 0.327               | 0.410                  | 0.217               | 0.394               | 0.836                  |
| <i>BRCA1</i>    | DFS               |                   | 0.109            | <b>0.001</b>                       | <b>0.004</b>         |                     |                        |                     |                     | 0.486                  |
|                 | OS                | 0.583             |                  | <b>0.016</b>                       | <b>0.004</b>         | <b>0.001</b>        | 0.591                  | 0.117               | 0.425               | 0.329                  |
| <i>CBX3</i>     | DFS               |                   | <b>0.092</b>     | 0.083                              | 0.775                |                     |                        |                     |                     | 0.226                  |
|                 | OS                | 0.271             |                  | 0.092                              | 0.586                | <b>0.022</b>        | 0.171                  | 0.460               | 0.398               | 0.119                  |
| <i>CDC6</i>     | DFS               |                   | 0.131            | <b>0.016</b>                       | <b>&lt;0.001</b>     |                     |                        |                     |                     | <b>0.093</b>           |
|                 | OS                | 0.552             |                  | <b>&lt;0.001</b>                   | <b>&lt;0.001</b>     | <b>0.003</b>        | 0.661                  | 0.518               | 0.165               | <b>0.085</b>           |
| <i>CDK2API</i>  | DFS               |                   | 0.885            | 0.938                              | 0.950                |                     |                        |                     |                     | 0.406                  |
|                 | OS                | 0.781             |                  | 0.986                              | 0.759                | 0.159               | 0.981                  | 0.158               | 0.256               | 0.208                  |
| <i>ERBB3</i>    | DFS               |                   | <b>0.013</b>     | <b>0.001</b>                       | 0.695                |                     |                        |                     |                     | 0.883                  |
|                 | OS                | 0.288             |                  | 0.193                              | 0.896                | 0.236               | 0.595                  | 0.183               | 0.895               | 0.881                  |
| <i>FUT3</i>     | DFS               |                   | 0.648            | 0.540                              | 0.728                |                     |                        |                     |                     | 0.502                  |
|                 | OS                | 0.621             |                  | 0.525                              | 0.187                | 0.234               | 0.752                  | 0.172               | 0.173               | 0.621                  |
| <i>IL11</i>     | DFS               |                   | 0.463            | <b>0.005</b>                       | 0.154                |                     |                        |                     |                     | 0.616                  |
|                 | OS                | <b>0.007</b>      |                  | <b>0.099</b>                       | 0.744                | 0.755               | 0.398                  | 0.723               | 0.281               | 0.876                  |
| <i>INHA</i>     | DFS               |                   | 0.236            | <b>0.028</b>                       | 0.818                |                     |                        |                     |                     | 0.694                  |
|                 | OS                | 0.690             |                  | <b>0.070</b>                       | 0.201                | <b>0.037</b>        | 0.402                  | <b>0.050</b>        | 0.970               | 0.708                  |
| <i>LCK</i>      | DFS               |                   | <b>0.047</b>     | <b>0.017</b>                       | 0.721                |                     |                        |                     |                     | 0.974                  |
|                 | OS                | 0.217             |                  | 0.137                              | 0.898                | <b>0.036</b>        | 0.145                  | <b>0.010</b>        | 0.310               | 0.959                  |
| <i>LIG1</i>     | DFS               |                   | 0.519            | <b>0.081</b>                       | 0.654                |                     |                        |                     |                     | 0.131                  |
|                 | OS                | <b>0.075</b>      |                  | 0.376                              | 0.691                | 0.727               | 0.989                  | 0.408               | 0.790               | 0.236                  |
| <i>MARS</i>     | DFS               |                   | 0.407            | <b>0.041</b>                       | <b>&lt;0.001</b>     |                     |                        |                     |                     | 0.447                  |
|                 | OS                | 0.121             |                  | 0.225                              | <b>0.002</b>         | 0.158               | 0.399                  | 0.207               | 0.553               | 0.309                  |
| <i>QKI</i>      | DFS               |                   | <b>0.001</b>     | 0.481                              | <b>0.012</b>         |                     |                        |                     |                     | 0.270                  |
|                 | OS                | 0.140             |                  | 0.216                              | <b>0.062</b>         | 0.993               | 0.613                  | 0.248               | <b>0.034</b>        | 0.187                  |
| <i>RAD51</i>    | DFS               |                   | 0.144            | <b>0.069</b>                       | <b>&lt;0.001</b>     |                     |                        |                     |                     | 0.324                  |
|                 | OS                | 0.428             |                  | <b>0.043</b>                       | <b>0.001</b>         | <b>0.003</b>        | 0.257                  | 0.532               | 0.529               | 0.197                  |
| <i>RAE1</i>     | DFS               |                   | 0.430            | 0.119                              | <b>0.076</b>         |                     |                        |                     |                     | 0.411                  |
|                 | OS                | 0.995             |                  | <b>0.053</b>                       | 0.158                | <b>0.015</b>        | <b>0.078</b>           | 0.663               | 0.322               | 0.639                  |
| <i>RND3</i>     | DFS               |                   | 0.764            | 0.939                              | 0.179                |                     |                        |                     |                     | 0.708                  |
|                 | OS                | 0.826             |                  | <b>0.007</b>                       | 0.753                | 0.216               | <b>0.069</b>           | 0.274               | 0.327               | 0.436                  |
| <i>RRM2</i>     | DFS               |                   | 0.792            | <b>0.093</b>                       | <b>&lt;0.001</b>     |                     |                        |                     |                     | 0.387                  |
|                 | OS                | 0.506             |                  | <b>0.001</b>                       | <b>0.009</b>         | <b>0.002</b>        | <b>0.086</b>           | 0.108               | 0.261               | 0.252                  |
| <i>SERPINE1</i> | DFS               |                   | 0.171            | 0.728                              | 0.658                |                     |                        |                     |                     | 0.877                  |
|                 | OS                | <b>0.025</b>      |                  | 0.634                              | <b>0.068</b>         | 0.298               | 0.609                  | 0.577               | 0.634               | 0.733                  |
| <i>SH3BGR</i>   | DFS               |                   | 0.324            | 0.490                              | 0.246                |                     |                        |                     |                     | 0.790                  |
|                 | OS                | 0.731             |                  | 0.604                              | 0.212                | 0.850               | 0.546                  | 0.782               | 0.951               | 0.840                  |
| <i>SIRT2</i>    | DFS               |                   | 0.639            | 0.618                              | 0.140                |                     |                        |                     |                     | 0.526                  |
|                 | OS                | <b>0.098</b>      |                  | <b>0.096</b>                       | 0.765                | <b>0.055</b>        | 0.424                  | 0.573               | 0.849               | 0.150                  |
| <i>SLC2A1</i>   | DFS               |                   | 0.415            | <b>0.011</b>                       | <b>&lt;0.001</b>     |                     |                        |                     |                     | 0.532                  |
|                 | OS                | 0.931             |                  | <b>0.013</b>                       | <b>&lt;0.001</b>     | <b>0.033</b>        | <b>0.040</b>           | 0.372               | 0.182               | 0.935                  |
| <i>SNRPB</i>    | DFS               |                   | 0.478            | <b>0.009</b>                       | <b>0.001</b>         |                     |                        |                     |                     | 0.123                  |
|                 | OS                | 0.834             |                  | <b>0.064</b>                       | <b>0.005</b>         | <b>&lt;0.001</b>    | 0.243                  | 0.203               | <b>0.094</b>        | 0.113                  |
| <i>SNRPE</i>    | DFS               |                   | 0.580            | 0.555                              | 0.834                |                     |                        |                     |                     | 0.673                  |
|                 | OS                | 0.771             |                  | <b>0.088</b>                       | 0.384                | <b>0.009</b>        | 0.310                  | 0.442               | 0.118               | 0.883                  |
| <i>SRSF1</i>    | DFS               |                   | 0.303            | <b>0.055</b>                       | 0.803                |                     |                        |                     |                     | 0.956                  |
|                 | OS                | 0.613             |                  | <b>0.035</b>                       | 0.621                | <b>0.039</b>        | 0.590                  | 0.196               | 0.207               | 0.492                  |
| <i>STC1</i>     | DFS               |                   | 0.167            | <b>0.059</b>                       | <b>0.002</b>         |                     |                        |                     |                     | 0.506                  |
|                 | OS                | <b>0.015</b>      |                  | <b>0.008</b>                       | <b>0.001</b>         | <b>0.018</b>        | 0.369                  | 0.633               | <b>0.069</b>        | 0.268                  |
| <i>TMSB4X</i>   | DFS               |                   | NA               | NA                                 | NA                   |                     |                        |                     |                     | NA                     |
|                 | OS                | 0.715             |                  |                                    |                      | 0.259               | NA                     | NA                  | <b>0.019</b>        | NA                     |
| <i>WNT3A</i>    | DFS               |                   | NA               | NA                                 | NA                   |                     |                        |                     |                     | 0.767                  |
|                 | OS                | NA                |                  |                                    |                      | 0.286               | 0.364                  | 0.372               | NA                  | 0.747                  |

<sup>1</sup>Significant *P* values or with a strong trend (*P*<0.1) in the Kaplan-Meier survival curves stratifying by median are shown in bold. <sup>a</sup>Bild GSE3141; <sup>b</sup>Lee GSE8894; <sup>c</sup>Director's Consortium GSE68465; <sup>d</sup>Okayama GSE31210;

<sup>e</sup>Tomida GSE13213; <sup>f</sup>Wilkerson GSE26939; <sup>g</sup>Larsen GSE5882; <sup>h</sup>Raponi GSE4573; <sup>i</sup>Wilkerson GSE17710..

**Table S4.** Summary of the strategy conducted for gene selection.

| Gene            | RNA prognostic value <sup>1</sup> | Commercial antibody available for WB and IHC                                 | Validated antibody            | Selected |
|-----------------|-----------------------------------|------------------------------------------------------------------------------|-------------------------------|----------|
| <i>ADARB1</i>   | Low                               |                                                                              |                               |          |
| <i>AGFG1</i>    | Low                               |                                                                              |                               |          |
| <i>BAG1</i>     | None                              |                                                                              |                               |          |
| <i>BRCA1</i>    | High                              | Yes (Genetex: GTX70113, Calbiochem OP92, Genetex GTX70111, Novus NBP1-41186) | Yes (Genetex: GTX70113)       | Yes      |
| <i>CBX3</i>     | Medium                            | No                                                                           |                               |          |
| <i>CDC6</i>     | High                              | Yes (Santa Cruz: SC-56273)                                                   | Yes (Santa Cruz: SC-56273)    | Yes      |
| <i>CDK2AP1</i>  | None                              |                                                                              |                               |          |
| <i>ERBB3</i>    | Medium                            | Yes (Santa Cruz SC415, Cell Signaling 12708, Abnova H0002065)                | No                            |          |
| <i>FUT3</i>     | None                              |                                                                              |                               |          |
| <i>IL11</i>     | Medium                            | No                                                                           |                               |          |
| <i>INHA</i>     | High                              | Yes (Invitrogen PA5-32452, Santa Cruz SC30146, Bios BS1032, Atlas 48834)     | No                            |          |
| <i>LCK</i>      | High                              | No                                                                           |                               |          |
| <i>LIG1</i>     | Medium                            | Yes (Areta International)                                                    | Yes (Areta International)     | Yes      |
| <i>MARS</i>     | Medium                            | Yes (Thermo Scientific: PA5-14997)                                           | No                            |          |
| <i>QKI</i>      | High                              | Yes (Sigma: HPA019123)                                                       | Yes (Sigma: HPA019123)        | Yes      |
| <i>RAD51</i>    | High                              | Yes (Calbiochem: PC130)                                                      | Yes (Calbiochem: PC130)       | Yes      |
| <i>RAE1</i>     | High                              | Yes (Genetex: EPR6923)                                                       | Yes (Genetex: EPR6923)        | Yes      |
| <i>RND3</i>     | Medium                            | Yes (Millipore 05-723, Proteintech 12534-1-AP)                               | No                            |          |
| <i>RRM2</i>     | High                              | Yes (Sigma: WH0006241M1)                                                     | Yes (Sigma: WH0006241M1)      | Yes      |
| <i>SERPINE1</i> | Medium                            | No                                                                           |                               |          |
| <i>SH3BGR</i>   | None                              |                                                                              |                               |          |
| <i>SIRT2</i>    | High                              | Yes (Santa Cruz: sc28298)                                                    | Yes (Santa Cruz: sc28298)     | Yes      |
| <i>SLC2A1</i>   | High                              | Yes (Proteintech: 21829-1-AP, Invitrogen PA5-16793)                          | Yes (Proteintech: 21829-1-AP) | Yes      |
| <i>SNRPB</i>    | High                              | No                                                                           |                               |          |
| <i>SNRPE</i>    | Medium                            | Yes (Proteintech: 20407-1-AP)                                                | Yes (Proteintech: 20407-1-AP) | Yes      |
| <i>SRSF1</i>    | Medium                            | Yes (Zymed: 32-4600)                                                         | Yes (Zymed: 32-4600)          | Yes      |
| <i>STC1</i>     | High                              | Yes (Santa Cruz: sc14346)                                                    | Yes (Santa Cruz: sc14346)     | Yes      |
| <i>TMSB4X</i>   | Low                               |                                                                              |                               |          |
| <i>WNT3A</i>    | None                              |                                                                              |                               |          |

<sup>1</sup>High: significant P value or strong trend in the Kaplan-Meier survival curves in at least three different databases. Medium: significant P value in at least two different databases. Low: significant P value in at least one database. None: no apparent association.

**Table S5.** Proteins finally selected for IHC study and their specific subcellular locations in human cell lines and tissue samples.

| <b>Protein</b> | <b>Nucleus</b> | <b>Cytoplasm</b> | <b>Membrane</b> |
|----------------|----------------|------------------|-----------------|
| <b>BRCA1</b>   | Yes            |                  |                 |
| <b>CDC6</b>    | Yes            | Yes              |                 |
| <b>LIG1</b>    | Yes            |                  |                 |
| <b>QKI</b>     | Yes            | Yes              |                 |
| <b>RAD51</b>   | Yes            | Yes              |                 |
| <b>RAE1</b>    | Yes            | Yes              |                 |
| <b>RRM2</b>    |                | Yes              |                 |
| <b>SIRT2</b>   | Yes            | Yes              |                 |
| <b>SLC2A1</b>  |                | Yes              | Yes             |
| <b>SNRPE</b>   | Yes            |                  |                 |
| <b>SRSF1</b>   | Yes            |                  |                 |
| <b>STC1</b>    | Yes            | Yes              |                 |

**Table S6.** C-index values generated in the internal validation of the prognostic signature by bootstrap & shrinkage method for DFS.

| Sample       | Observed C-index | Validated C-index | Shrinkage | Sample                   | Observed C-index | Validated C-index | Shrinkage |
|--------------|------------------|-------------------|-----------|--------------------------|------------------|-------------------|-----------|
| Original     | 0.6257           | 0.6257            | 0.0000    | Bootstrap 51             | 0.6140           | 0.6311            | -0.0171   |
| Bootstrap 1  | 0.6275           | 0.6293            | -0.0019   | Bootstrap 52             | 0.5930           | 0.6118            | -0.0188   |
| Bootstrap 2  | 0.6153           | 0.6183            | -0.0030   | Bootstrap 53             | 0.6643           | 0.6198            | 0.0446    |
| Bootstrap 3  | 0.6172           | 0.6212            | -0.0040   | Bootstrap 54             | 0.6284           | 0.6299            | -0.0014   |
| Bootstrap 4  | 0.6473           | 0.6195            | 0.0278    | Bootstrap 55             | 0.6190           | 0.6072            | 0.0118    |
| Bootstrap 5  | 0.6440           | 0.6166            | 0.0273    | Bootstrap 56             | 0.5999           | 0.6213            | -0.0214   |
| Bootstrap 6  | 0.5846           | 0.6333            | -0.0487   | Bootstrap 57             | 0.6447           | 0.6272            | 0.0175    |
| Bootstrap 7  | 0.6125           | 0.6280            | -0.0155   | Bootstrap 58             | 0.6254           | 0.6272            | -0.0017   |
| Bootstrap 8  | 0.5789           | 0.5712            | 0.0076    | Bootstrap 59             | 0.6243           | 0.6122            | 0.0121    |
| Bootstrap 9  | 0.6264           | 0.6201            | 0.0063    | Bootstrap 60             | 0.6100           | 0.6194            | -0.0094   |
| Bootstrap 10 | 0.6246           | 0.6246            | 0.0000    | Bootstrap 61             | 0.6494           | 0.6149            | 0.0345    |
| Bootstrap 11 | 0.6306           | 0.6288            | 0.0018    | Bootstrap 62             | 0.6177           | 0.6153            | 0.0024    |
| Bootstrap 12 | 0.5978           | 0.6147            | -0.0170   | Bootstrap 63             | 0.6057           | 0.6051            | 0.0006    |
| Bootstrap 13 | 0.6446           | 0.6159            | 0.0288    | Bootstrap 64             | 0.6492           | 0.6279            | 0.0213    |
| Bootstrap 14 | 0.6523           | 0.6268            | 0.0256    | Bootstrap 65             | 0.6610           | 0.6254            | 0.0356    |
| Bootstrap 15 | 0.6638           | 0.6231            | 0.0407    | Bootstrap 66             | 0.6753           | 0.6364            | 0.0389    |
| Bootstrap 16 | 0.6024           | 0.5801            | 0.0223    | Bootstrap 67             | 0.6564           | 0.6144            | 0.0420    |
| Bootstrap 17 | 0.6499           | 0.6320            | 0.0180    | Bootstrap 68             | 0.6407           | 0.6254            | 0.0153    |
| Bootstrap 18 | 0.6717           | 0.6324            | 0.0393    | Bootstrap 69             | 0.5930           | 0.6169            | -0.0239   |
| Bootstrap 19 | 0.6516           | 0.6256            | 0.0260    | Bootstrap 70             | 0.6546           | 0.6218            | 0.0328    |
| Bootstrap 20 | 0.6315           | 0.6076            | 0.0239    | Bootstrap 71             | 0.6345           | 0.6232            | 0.0112    |
| Bootstrap 21 | 0.6104           | 0.6182            | -0.0078   | Bootstrap 72             | 0.5971           | 0.6315            | -0.0344   |
| Bootstrap 22 | 0.6539           | 0.6278            | 0.0261    | Bootstrap 73             | 0.6268           | 0.6300            | -0.0033   |
| Bootstrap 23 | 0.6297           | 0.6337            | -0.0040   | Bootstrap 74             | 0.5847           | 0.6266            | -0.0418   |
| Bootstrap 24 | 0.6326           | 0.6213            | 0.0113    | Bootstrap 75             | 0.6316           | 0.6272            | 0.0044    |
| Bootstrap 25 | 0.6483           | 0.6164            | 0.0319    | Bootstrap 76             | 0.6307           | 0.6250            | 0.0057    |
| Bootstrap 26 | 0.6093           | 0.6247            | -0.0154   | Bootstrap 77             | 0.6564           | 0.6155            | 0.0409    |
| Bootstrap 27 | 0.6274           | 0.6268            | 0.0006    | Bootstrap 78             | 0.6609           | 0.6280            | 0.0329    |
| Bootstrap 28 | 0.6314           | 0.6257            | 0.0057    | Bootstrap 79             | 0.6234           | 0.6236            | -0.0002   |
| Bootstrap 29 | 0.6594           | 0.6194            | 0.0400    | Bootstrap 80             | 0.5593           | 0.5693            | -0.0099   |
| Bootstrap 30 | 0.6683           | 0.6210            | 0.0473    | Bootstrap 81             | 0.6314           | 0.6161            | 0.0153    |
| Bootstrap 31 | 0.6418           | 0.5971            | 0.0448    | Bootstrap 82             | 0.6243           | 0.6330            | -0.0087   |
| Bootstrap 32 | 0.6256           | 0.6016            | 0.0240    | Bootstrap 83             | 0.6582           | 0.6220            | 0.0362    |
| Bootstrap 33 | 0.6712           | 0.6277            | 0.0435    | Bootstrap 84             | 0.6406           | 0.6389            | 0.0017    |
| Bootstrap 34 | 0.6312           | 0.6278            | 0.0035    | Bootstrap 85             | 0.5948           | 0.6274            | -0.0326   |
| Bootstrap 35 | 0.6129           | 0.6251            | -0.0122   | Bootstrap 86             | 0.7015           | 0.6227            | 0.0788    |
| Bootstrap 36 | 0.6555           | 0.6287            | 0.0269    | Bootstrap 87             | 0.6847           | 0.6344            | 0.0504    |
| Bootstrap 37 | 0.6540           | 0.6174            | 0.0366    | Bootstrap 88             | 0.6567           | 0.6183            | 0.0384    |
| Bootstrap 38 | 0.6616           | 0.6323            | 0.0292    | Bootstrap 89             | 0.5949           | 0.5982            | -0.0034   |
| Bootstrap 39 | 0.6285           | 0.6072            | 0.0213    | Bootstrap 90             | 0.5955           | 0.6168            | -0.0213   |
| Bootstrap 40 | 0.6611           | 0.6155            | 0.0455    | Bootstrap 91             | 0.5892           | 0.6101            | -0.0209   |
| Bootstrap 41 | 0.6076           | 0.6063            | 0.0014    | Bootstrap 92             | 0.6368           | 0.6271            | 0.0097    |
| Bootstrap 42 | 0.6822           | 0.6262            | 0.0560    | Bootstrap 93             | 0.6399           | 0.6072            | 0.0327    |
| Bootstrap 43 | 0.6456           | 0.6246            | 0.0210    | Bootstrap 94             | 0.6568           | 0.6238            | 0.0330    |
| Bootstrap 44 | 0.6186           | 0.6273            | -0.0088   | Bootstrap 95             | 0.6132           | 0.5946            | 0.0186    |
| Bootstrap 45 | 0.6264           | 0.6230            | 0.0034    | Bootstrap 96             | 0.5997           | 0.6169            | -0.0172   |
| Bootstrap 46 | 0.6638           | 0.6275            | 0.0363    | Bootstrap 97             | 0.6743           | 0.6176            | 0.0567    |
| Bootstrap 47 | 0.6254           | 0.6101            | 0.0152    | Bootstrap 98             | 0.6605           | 0.6337            | 0.0268    |
| Bootstrap 48 | 0.6069           | 0.6245            | -0.0176   | Bootstrap 99             | 0.6675           | 0.6302            | 0.0373    |
| Bootstrap 49 | 0.6104           | 0.6240            | -0.0136   | Bootstrap 100            | 0.6785           | 0.6303            | 0.0482    |
| Bootstrap 50 | 0.5595           | 0.6160            | -0.0566   | <b>Shrinkage average</b> |                  | <b>0.0123</b>     |           |

**Table S7.** C-index values generated in the internal validation of the prognostic signature by bootstrap & shrinkage method for OS.

| Sample       | Observed C-index | Validated C-index | Shrinkage | Sample                   | Observed C-index | Validated C-index | Shrinkage |
|--------------|------------------|-------------------|-----------|--------------------------|------------------|-------------------|-----------|
| Original     | 0.6596           | 0.6596            | 0.0000    | Bootstrap 51             | 0.7053           | 0.6641            | 0.0412    |
| Bootstrap 1  | 0.7021           | 0.6737            | 0.0284    | Bootstrap 52             | 0.6571           | 0.6639            | -0.0068   |
| Bootstrap 2  | 0.6582           | 0.6661            | -0.0079   | Bootstrap 53             | 0.7299           | 0.6702            | 0.0597    |
| Bootstrap 3  | 0.6795           | 0.6773            | 0.0022    | Bootstrap 54             | 0.6767           | 0.6560            | 0.0207    |
| Bootstrap 4  | 0.6824           | 0.6636            | 0.0188    | Bootstrap 55             | 0.6898           | 0.6551            | 0.0346    |
| Bootstrap 5  | 0.6826           | 0.6566            | 0.0261    | Bootstrap 56             | 0.6191           | 0.6686            | -0.0494   |
| Bootstrap 6  | 0.6154           | 0.6623            | -0.0469   | Bootstrap 57             | 0.6783           | 0.6619            | 0.0164    |
| Bootstrap 7  | 0.6421           | 0.6506            | -0.0085   | Bootstrap 58             | 0.6885           | 0.6658            | 0.0227    |
| Bootstrap 8  | 0.6059           | 0.6536            | -0.0477   | Bootstrap 59             | 0.6601           | 0.6584            | 0.0017    |
| Bootstrap 9  | 0.6403           | 0.6588            | -0.0185   | Bootstrap 60             | 0.6840           | 0.6603            | 0.0237    |
| Bootstrap 10 | 0.6901           | 0.6717            | 0.0184    | Bootstrap 61             | 0.6617           | 0.6642            | -0.0025   |
| Bootstrap 11 | 0.6908           | 0.6672            | 0.0236    | Bootstrap 62             | 0.7285           | 0.6713            | 0.0572    |
| Bootstrap 12 | 0.6990           | 0.6523            | 0.0466    | Bootstrap 63             | 0.6912           | 0.6448            | 0.0464    |
| Bootstrap 13 | 0.6808           | 0.6670            | 0.0138    | Bootstrap 64             | 0.6710           | 0.6740            | -0.0029   |
| Bootstrap 14 | 0.6663           | 0.6669            | -0.0005   | Bootstrap 65             | 0.7372           | 0.6707            | 0.0665    |
| Bootstrap 15 | 0.6665           | 0.6749            | -0.0084   | Bootstrap 66             | 0.6901           | 0.6734            | 0.0167    |
| Bootstrap 16 | 0.5903           | 0.6428            | -0.0525   | Bootstrap 67             | 0.6707           | 0.6665            | 0.0041    |
| Bootstrap 17 | 0.7131           | 0.6766            | 0.0365    | Bootstrap 68             | 0.6804           | 0.6763            | 0.0042    |
| Bootstrap 18 | 0.6552           | 0.6527            | 0.0025    | Bootstrap 69             | 0.6646           | 0.6438            | 0.0208    |
| Bootstrap 19 | 0.6909           | 0.6667            | 0.0242    | Bootstrap 70             | 0.6890           | 0.6642            | 0.0248    |
| Bootstrap 20 | 0.7068           | 0.6483            | 0.0585    | Bootstrap 71             | 0.6870           | 0.6757            | 0.0113    |
| Bootstrap 21 | 0.6460           | 0.6633            | -0.0173   | Bootstrap 72             | 0.6435           | 0.6657            | -0.0222   |
| Bootstrap 22 | 0.6654           | 0.6542            | 0.0112    | Bootstrap 73             | 0.6623           | 0.6608            | 0.0015    |
| Bootstrap 23 | 0.6624           | 0.6499            | 0.0125    | Bootstrap 74             | 0.6518           | 0.6670            | -0.0153   |
| Bootstrap 24 | 0.6810           | 0.6707            | 0.0103    | Bootstrap 75             | 0.6743           | 0.6697            | 0.0046    |
| Bootstrap 25 | 0.7351           | 0.6791            | 0.0559    | Bootstrap 76             | 0.6569           | 0.6675            | -0.0107   |
| Bootstrap 26 | 0.6931           | 0.6792            | 0.0139    | Bootstrap 77             | 0.7009           | 0.6548            | 0.0461    |
| Bootstrap 27 | 0.7060           | 0.6715            | 0.0345    | Bootstrap 78             | 0.7469           | 0.6596            | 0.0873    |
| Bootstrap 28 | 0.6726           | 0.6711            | 0.0015    | Bootstrap 79             | 0.6873           | 0.6702            | 0.0171    |
| Bootstrap 29 | 0.6920           | 0.6619            | 0.0300    | Bootstrap 80             | 0.6277           | 0.6688            | -0.0412   |
| Bootstrap 30 | 0.7091           | 0.6786            | 0.0304    | Bootstrap 81             | 0.6965           | 0.6807            | 0.0157    |
| Bootstrap 31 | 0.6682           | 0.6383            | 0.0299    | Bootstrap 82             | 0.6736           | 0.6677            | 0.0059    |
| Bootstrap 32 | 0.7100           | 0.6647            | 0.0454    | Bootstrap 83             | 0.6864           | 0.6673            | 0.0191    |
| Bootstrap 33 | 0.7261           | 0.6677            | 0.0584    | Bootstrap 84             | 0.6833           | 0.6743            | 0.0090    |
| Bootstrap 34 | 0.6445           | 0.6436            | 0.0009    | Bootstrap 85             | 0.7100           | 0.6590            | 0.0510    |
| Bootstrap 35 | 0.6712           | 0.6669            | 0.0044    | Bootstrap 86             | 0.7156           | 0.6586            | 0.0571    |
| Bootstrap 36 | 0.6788           | 0.6824            | -0.0036   | Bootstrap 87             | 0.7016           | 0.6751            | 0.0266    |
| Bootstrap 37 | 0.7251           | 0.6730            | 0.0521    | Bootstrap 88             | 0.6559           | 0.6599            | -0.0039   |
| Bootstrap 38 | 0.6832           | 0.6660            | 0.0172    | Bootstrap 89             | 0.6577           | 0.6642            | -0.0065   |
| Bootstrap 39 | 0.6580           | 0.6479            | 0.0101    | Bootstrap 90             | 0.6422           | 0.6587            | -0.0165   |
| Bootstrap 40 | 0.6487           | 0.6529            | -0.0042   | Bootstrap 91             | 0.6688           | 0.6641            | 0.0048    |
| Bootstrap 41 | 0.6638           | 0.6542            | 0.0096    | Bootstrap 92             | 0.7136           | 0.6739            | 0.0397    |
| Bootstrap 42 | 0.7077           | 0.6679            | 0.0398    | Bootstrap 93             | 0.6840           | 0.6751            | 0.0089    |
| Bootstrap 43 | 0.6177           | 0.6664            | -0.0486   | Bootstrap 94             | 0.6742           | 0.6693            | 0.0049    |
| Bootstrap 44 | 0.6950           | 0.6757            | 0.0194    | Bootstrap 95             | 0.7050           | 0.6791            | 0.0259    |
| Bootstrap 45 | 0.7013           | 0.6677            | 0.0336    | Bootstrap 96             | 0.6660           | 0.6692            | -0.0032   |
| Bootstrap 46 | 0.7009           | 0.6615            | 0.0394    | Bootstrap 97             | 0.7637           | 0.6698            | 0.0938    |
| Bootstrap 47 | 0.7002           | 0.6768            | 0.0234    | Bootstrap 98             | 0.7123           | 0.6571            | 0.0552    |
| Bootstrap 48 | 0.6759           | 0.6768            | -0.0009   | Bootstrap 99             | 0.7063           | 0.6652            | 0.0411    |
| Bootstrap 49 | 0.6886           | 0.6668            | 0.0218    | Bootstrap 100            | 0.6834           | 0.6702            | 0.0131    |
| Bootstrap 50 | 0.6096           | 0.6604            | -0.0508   | <b>Shrinkage average</b> |                  | <b>0.0149</b>     |           |

**Table S8.** Univariate and multivariate Cox proportional hazards analysis of PI score and clinicopathological parameters in CIBERES-CUN cohort (early stages).

| Validation cohort         | CUN n (%)  | DFS <sup>1,2</sup>  |              |                       |              | CIBERES -CUN n (%) | OS <sup>3</sup>     |              |                       |              |
|---------------------------|------------|---------------------|--------------|-----------------------|--------------|--------------------|---------------------|--------------|-----------------------|--------------|
|                           |            | Univariate analysis |              | Multivariate analysis |              |                    | Univariate analysis |              | Multivariate analysis |              |
|                           |            | HR (95% CI)         | P value      | HR (95% CI)           | P value      |                    | HR (95% CI)         | P value      | HR (95% CI)           | P value      |
| <b>PI<sup>4</sup></b>     |            | 2.13 (0.99-4.57)    | <b>0.053</b> | 3.25 (1.26-8.41)      | <b>0.015</b> |                    | 2.17 (1.18-3.98)    | <b>0.013</b> | 2.10 (1.12-3.93)      | <b>0.021</b> |
| <b>Stage</b>              |            |                     | 0.166        |                       | 0.474        |                    |                     | 0.166        |                       | <b>0.229</b> |
| <b>IA</b>                 | 13 (40.6%) | 1                   |              | 1                     |              | 33 (33.3%)         | 1                   |              | 1                     |              |
| <b>IB</b>                 | 6 (18.8%)  | 5.83 (1.06-32.04)   | <b>0.042</b> | 4.23 (0.70-25.62)     | 0.117        | 24 (24.2%)         | 1.38 (0.42-4.54)    | 0.594        | 1.16 (0.35-3.82)      | 0.814        |
| <b>IIA</b>                | 2 (6.3%)   | 0 (0.00-0.00)       | 0.989        | 0 (0.00-0.00)         | 0.990        | 6 (6.1%)           | 1.53 (0.18-12.73)   | 0.696        | 1.12 (0.13-9.46)      | 0.919        |
| <b>IIB</b>                | 11 (34.4%) | 5.79 (1.15-29.28)   | <b>0.034</b> | 2.69 (0.31-23.68)     | 0.373        | 36 (36.4%)         | 2.84 (1.08-7.53)    | <b>0.035</b> | 2.47 (0.93-6.59)      | 0.071        |
| <b>Gender</b>             |            |                     | 0.153        |                       |              |                    |                     | 0.933        |                       |              |
| <b>Male</b>               | 27 (84.4%) | 1                   |              |                       |              | 73 (73.7%)         | 1                   |              |                       |              |
| <b>Female</b>             | 5 (15.6%)  | 2.68 (0.68-10.33)   |              |                       |              | 26 (26.3%)         | 1.04 (0.41-2.61)    |              |                       |              |
| <b>Age (years)</b>        |            |                     | 0.624        |                       | 0.187        |                    |                     | 0.584        |                       |              |
| <b>&lt;65</b>             | 20 (62.5%) | 1                   |              | 1                     |              | 59 (59.6%)         | 1                   |              |                       |              |
| <b>≥65</b>                | 12 (37.5%) | 1.33 (0.42-4.22)    |              | 3.13 (0.58-17.06)     |              | 40 (40.4%)         | 1.25 (0.57-2.75)    |              |                       |              |
| <b>Adjuvant treatment</b> |            |                     | 0.101        |                       |              |                    |                     |              |                       |              |
| <b>No</b>                 | 20 (62.5%) | 1                   |              |                       |              |                    |                     |              |                       |              |
| <b>Yes</b>                | 12 (37.5%) | 2.60 (0.83-8.17)    |              |                       |              |                    |                     |              |                       |              |
| <b>Tobacco</b>            |            |                     | 0.396        |                       |              |                    |                     |              |                       |              |
| <b>Never</b>              | 5 (15.6%)  | 1                   |              |                       |              |                    |                     |              |                       |              |
| <b>Former</b>             | 24 (75.0%) | 0.42 (0.11-1.63)    | 0.212        |                       |              |                    |                     |              |                       |              |
| <b>Current</b>            | 3 (9.4%)   | 0.30 (0.03-2.94)    | 0.298        |                       |              |                    |                     |              |                       |              |

<sup>1</sup>Events/n = 12/32. <sup>2</sup>Complete data available for CUN patients. <sup>3</sup>Events/n = 25/99. <sup>4</sup>PI: prognostic index.



**Table S9.** Prognostic value of PI and stage in univariate and bivariate models for MDA cohort.

| MDA cohort                        |        |                  |        |                  |
|-----------------------------------|--------|------------------|--------|------------------|
|                                   | DFS    |                  | OS     |                  |
|                                   | LR     | P value          | LR     | P value          |
| <b>Stage</b>                      | 53.449 | <b>&lt;0.001</b> | 24.427 | <b>&lt;0.001</b> |
| <b>Stage &amp; PI</b>             | 66.566 | <b>&lt;0.001</b> | 44.063 | <b>&lt;0.001</b> |
| <b>LR<sup>1</sup> improvement</b> | 13.385 | <b>&lt;0.001</b> | 19.950 | <b>&lt;0.001</b> |

<sup>1</sup>LR: Likelihood ratio

**Table S10.** Univariate and multivariate Cox proportional hazards analysis of CPI score and clinicopathological parameters for DFS and OS in MDA cohort.

| MDA Cohort                | n (%)       | DFS <sup>1</sup>    |                  |                       |                  | OS <sup>2</sup>     |                  |                       |                  |
|---------------------------|-------------|---------------------|------------------|-----------------------|------------------|---------------------|------------------|-----------------------|------------------|
|                           |             | Univariate analysis |                  | Multivariate analysis |                  | Univariate analysis |                  | Multivariate analysis |                  |
|                           |             | HR (95% CI)         | P value          | HR (95% CI)           | P value          | HR (95% CI)         | P value          | HR (95% CI)           | P value          |
| <b>CPI<sup>3</sup></b>    |             | 2.72 (2.05-3.60)    | <b>&lt;0.001</b> | 2.95 (2.13-4.08)      | <b>&lt;0.001</b> | 2.67 (1.97-3.63)    | <b>&lt;0.001</b> | 2.56 (1.88-3.49)      | <b>&lt;0.001</b> |
| <b>Gender</b>             |             |                     | 0.132            |                       | 0.899            |                     | <b>0.009</b>     |                       | 0.132            |
| <b>Male</b>               | 92 (40.7 %) | 1                   |                  | 1                     |                  | 1                   |                  | 1                     |                  |
| <b>Female</b>             | 134 (59.3%) | 0.73 (0.49-1.10)    |                  | 1.03 (0.67-1.58)      |                  | 0.55 (0.35-0.86)    |                  | 0.71 (0.45-1.11)      |                  |
| <b>Age</b>                |             |                     | 0.910            |                       |                  |                     | 0.434            |                       |                  |
| <b>&lt;65</b>             | 29 (12.8%)  | 1                   |                  |                       |                  | 1                   |                  |                       |                  |
| <b>≥65</b>                | 197 (87.2%) | 1.04 (0.57-1.90)    |                  |                       |                  | 1.34 (0.64-2.78)    |                  |                       |                  |
| <b>Adjuvant treatment</b> |             |                     | 0.092            |                       | 0.391            |                     | 0.838            |                       |                  |
| <b>No</b>                 | 130 (57.5%) | 1                   |                  | 1                     |                  | 1                   |                  |                       |                  |
| <b>Yes</b>                | 83 (36.8%)  | 1.53 (1.00-2.33)    |                  | 0.82 (0.51-1.30)      |                  | 1.05 (0.65-1.69)    |                  |                       |                  |
| <b>Unknown</b>            | 8 (5.7%)    |                     |                  |                       |                  |                     |                  |                       |                  |
| <b>Tobacco</b>            |             |                     | 0.764            |                       |                  |                     | 0.683            |                       |                  |
| <b>Never</b>              | 39 (17.3%)  | 1                   |                  |                       |                  | 1                   |                  |                       |                  |
| <b>Former</b>             | 107 (47.3%) | 1.15 (0.63-2.10)    | 0.648            |                       |                  | 0.82 (0.45-1.51)    | 0.523            |                       |                  |
| <b>Current</b>            | 80 (35.4%)  | 1.26 (0.68-2.34)    | 0.469            |                       |                  | 1.00 (0.54-1.87)    | 0.992            |                       |                  |

<sup>1</sup>Events/n= 93/226 in univariate and multivariate analysis (DFS). <sup>2</sup>Events/n= 77/226 in univariate and multivariate analysis (OS). <sup>3</sup>CPI: combined prognostic index.

**Table S11.** Univariate and multivariate Cox proportional hazards analysis of CPI and clinicopathological parameters for OS in CIBERES-CUN cohort.

| Validation cohort         | CUN n (%)  | DFS <sup>1,2</sup>  |              |                       |              | CIBERES-CUN n (%) | OS <sup>3</sup>     |                  |                       |                  |
|---------------------------|------------|---------------------|--------------|-----------------------|--------------|-------------------|---------------------|------------------|-----------------------|------------------|
|                           |            | Univariate analysis |              | Multivariate analysis |              |                   | Univariate analysis |                  | Multivariate analysis |                  |
|                           |            | HR (95% CI)         | P value      | HR (95% CI)           | P value      |                   | HR (95% CI)         | P value          | HR (95% CI)           | P value          |
| <b>CPI<sup>4</sup></b>    |            | 2.10 (1.27-3.47)    | <b>0.004</b> | 2.17 (1.20-3.92)      | <b>0.011</b> |                   | 2.35 (1.57-3.52)    | <b>&lt;0.001</b> | 2.36 (1.58-3.51)      | <b>&lt;0.001</b> |
| <b>Gender</b>             |            |                     | 0.152        |                       | 0.054        |                   |                     | 0.709            |                       |                  |
| <b>Male</b>               | 33 (84.6%) | 1                   |              | 1                     |              | 86 (75.4%)        | 1                   |                  |                       |                  |
| <b>Female</b>             | 6 (15.4%)  | 2.31 (0.74-7.27)    |              | 3.37 (0.98-11.63)     |              | 28 (24.6%)        | 0.85 (0.37-1.96)    |                  |                       |                  |
| <b>Age (years)</b>        |            |                     | 0.885        |                       | 0.587        |                   |                     | 0.176            |                       | 0.114            |
| <b>&lt;65</b>             | 24 (61.5%) | 1                   |              | 1                     |              | 65 (57.0%)        | 1                   |                  | 1                     |                  |
| <b>≥65</b>                | 15 (38.5%) | 0.93 (0.34-2.51)    |              | 1.35 (0.46-4.013)     |              | 49 (43.0%)        | 1.57 (0.82-3.03)    |                  | 1.71 (0.88-3.30)      |                  |
| <b>Adjuvant treatment</b> |            |                     | 0.047        |                       |              |                   |                     |                  |                       |                  |
| <b>No</b>                 | 22 (56.4%) | 1                   |              |                       |              |                   |                     |                  |                       |                  |
| <b>Yes</b>                | 17 (43.6%) | 2.70 (1.01-7.16)    |              |                       |              |                   |                     |                  |                       |                  |
| <b>Tobacco</b>            |            |                     | 0.769        |                       |              |                   |                     |                  |                       |                  |
| <b>Never</b>              | 5 (12.8%)  | 1                   |              |                       |              |                   |                     |                  |                       |                  |
| <b>Former</b>             | 30 (76.9%) | 0.62 (0.17-2.23)    |              | 0.469                 |              |                   |                     |                  |                       |                  |
| <b>Current</b>            | 4 (10.3%)  | 0.67 (0.11-4.07)    |              | 0.662                 |              |                   |                     |                  |                       |                  |

<sup>1</sup>Events/n= 17/39. <sup>2</sup>Complete data available for CUN patients. <sup>3</sup>Events/N = 36/114<sup>4</sup>CPI: combined prognostic index
